# Supplementary material for: Efficacy of Low-Molecular-Weight Fucoidan as a Supplemental Therapy in Metastatic Colorectal Cancer Patients: A Double-Blind Randomized Controlled Trial
Source: Mar Drugs. 2017 Apr 21;15(4):122. doi: 10.3390/md15040122 (PMC5408268; doi:10.3390/md15040122)
Supplement: Supplementary file 1 [file marinedrugs-15-00122-s001.pdf]

# Efficacy of Low-Molecular-Weight Fucoidan as a Supplemental Therapy in Metastatic Colorectal Cancer Patients: A Double-Blind Randomized Controlled Trial

Hsiang-Lin Tsai <sup>1,2,†</sup>, Chi-Jung Tai <sup>3,4,†</sup>, Ching-Wen Huang <sup>1,2</sup>, Fang-Rong Chang <sup>3</sup> and Jaw-Yuan Wang <sup>1,2,5,6,7,8,\*</sup>

<sup>1</sup> Division of Colorectal Surgery, Department of Surgery, Kaohsiung Medical University Hospital, Kaohsiung Medical University, Kaohsiung 80708, Taiwan; chunpin870132@yahoo.com.tw(H.L.T); baseball5824@yahoo.com.tw (C.W.H);

<sup>2</sup> Department of Surgery, Faculty of Medicine, College of Medicine, Kaohsiung Medical University, Kaohsiung 80708, Taiwan

<sup>3</sup> Graduate Institute of Natural Product, College of Pharmacy, Kaohsiung Medical University, Kaohsiung 80708, Taiwan; taichijung@gmail.com (C.J.T); aaronfrc@kmu.edu.tw (F.R.C)

<sup>4</sup> Department of Family Medicine, Pingtung Hospital, Ministry of Health and Welfare, 80708, Taiwan

<sup>5</sup> Graduate Institute of Clinical Medicine, College of Medicine, Kaohsiung Medical University, Kaohsiung 80708, Taiwan

<sup>6</sup> Center for Biomarkers and Biotech Drugs, College of Medicine, Kaohsiung Medical University, Kaohsiung 80708, Taiwan

<sup>7</sup> Research Center for Environmental Medicine, College of Medicine, Kaohsiung Medical University, Kaohsiung 80708, Taiwan

<sup>8</sup> Research Center for Natural Products & Drug Development, Kaohsiung Medical University, Kaohsiung 80708, Taiwan

\* Correspondence: jawyuanwang@gmail.com (J.Y.W); Tel.: +886-7-3122-805, Fax: +886-7-3114-679

† The authors have contributed equally to this work.

**Supplementary table 1. The definitions of adverse effects grading according to Common Terminology Criteria for Adverse Events (CTCAE) version 4.02**

| Grading                 | 0                                  | 1                                                         | 2                                                                        | 3                                         | 4                                                            |
|-------------------------|------------------------------------|-----------------------------------------------------------|--------------------------------------------------------------------------|-------------------------------------------|--------------------------------------------------------------|
| Leukopenia              | >3000                              | 2501-3000                                                 | 2001-2500                                                                | 1001-2000                                 | <1000                                                        |
| Anemia                  | >10                                | 9-10                                                      | 8-9                                                                      | 6.5-8                                     | <6.5                                                         |
| Thrombocytopenia        | >100000                            | 75000-100000                                              | 50000-75000                                                              | 25000-50000                               | <25000                                                       |
| Abnormal liver function | Below upper limit                  | 1-2 X upper limit                                         | 2-3 X upper limit                                                        | 3-5 X upper limit                         | >5 X upper limit                                             |
| Impaired renal function | increase < 0.3 mg/dl over baseline | 1.5 -2X baseline or increase >0.3 mg/dl over baseline     | 2-3 X baseline                                                           | >3 X baseline or Cr > 4 mg/dL             | Need immediate dialysis                                      |
| Mucositis oral          | No lesion                          | Asymptomatic or mild symptoms; intervention not indicated | Moderate pain; not interfering with oral intake; modified diet indicated | Severe pain; interfering with oral intake | Life-threatening consequences; urgent intervention indicated |
| Vomiting                | No symptoms                        | Mild symptoms                                             | Moderate symptoms; frequent                                              | Persisted; very much                      | -                                                            |
| Alopecia                | No hair loss                       | Not obvious from close inspection                         | Hair loss of up to 50% . That is not obvious from a                      | Hair loss >50%                            | Total hair loss                                              |

|               |            |                                                         |                                                                                                                                 |                                                                            |                                     |
|---------------|------------|---------------------------------------------------------|---------------------------------------------------------------------------------------------------------------------------------|----------------------------------------------------------------------------|-------------------------------------|
| Pruritis      |            | Mild or localized;<br>topical<br>intervention indicated | distance but only<br>on close inspection<br>Intense or<br>widespread;<br>Intermittent; Skin<br>change, need oral<br>medication. | Intense or<br>widespread;<br>constant;<br>oral corticosteroid<br>indicated | -                                   |
| Bloody stool  | No symptom | Mild symptom                                            | Moderate symptom                                                                                                                | Severe symptom;<br>anal bleeding                                           | Urgent intervention<br>indicated    |
| Taste problem | No symptom | A little                                                | Quite a bit                                                                                                                     | Very much                                                                  | urgent<br>intervention<br>indicated |

**Supplementary table 2. The definitions of quality of life grading according to European Organization for Research and Treatment of Cancer (EORTC) QLQ-CR29 and QLQ-CR30**

| Grading                           | 0          | 1                                         | 2                                                       | 3                                                                     |
|-----------------------------------|------------|-------------------------------------------|---------------------------------------------------------|-----------------------------------------------------------------------|
| Limited in doing daily activities | No limit   | A little                                  | Quite a bit                                             | Very much                                                             |
| Limited in doing hobbies          | No limit   | A little                                  | Quite a bit                                             | Very much                                                             |
| Limited in walking                | No limit   | A little; in long distance                | Quite a bit; in short distance                          | Very much                                                             |
| Trouble sleeping                  | No symptom | Mild symptom                              | Moderate symptom; Need hypnotics                        | Severe symptom; No improvement under hypnotics                        |
| Depression                        | No symptom | Mild depressive symptoms                  | Moderate depressive symptoms; limiting instrumental ADL | Severe depressive symptoms; limiting self care ADL;                   |
| Anxiety                           | No symptom | Mild symptoms; intervention not indicated | Moderate symptoms; limiting instrumental ADL            | Severe symptoms; limiting self care ADL; hospitalization notindicated |
| Fatigue                           | No symptom | A little                                  | Quite a bit                                             | Very much                                                             |

|                                    |            |          |             |           |
|------------------------------------|------------|----------|-------------|-----------|
| Feel weakness                      | No symptom | A little | Quite a bit | Very much |
| Need help with<br>personal hygiene | No limit   | A little | Quite a bit | Very much |
